# Supplementary material for: Efficacy of a New Selective Indole-based Histone Deacetylase 10 Inhibitor in Targeted Anticancer Therapy
Source: Research Square preprint supplement (doi:10.21203/rs.3.rs-5950104/v1), 2025-02-07

**Supplementary Information**

**Efficacy of a New Selective Indole-based Histone Deacetylase 10 Inhibitor in Targeted Anticancer Therapy**

Amer H. Tarawneh1,*, Salah A. Al-Trawnehb2,3,*, Talha Z. Yesiloglu4, Matthes Zessin5, Dina Robaa4, Cyril Barinka6, Mike Schutkowski5, Wolfgang Sippl4,*, Samir A. Ross3,7,*

1 Department of Chemistry, Tafila Technical University, P.O. Box 179, Tafila, Jordan

2 Chemistry Department, Faculty of Science, Mu'tah University, Karak 61710, Jordan

3 National Center for Natural Products Research, Research Institute of Pharmaceutical Sciences, School of Pharmacy, University of Mississippi, University, MS, 38677, USA

4 Institute of Pharmacy, Martin-Luther University of Halle-Wittenberg, 06120 Halle/Saale, Germany

5 Institute of Biotechnology, Martin-Luther University of Halle-Wittenberg, 06120 Halle/Saale, Germany

6 Institute of Biotechnology of the Czech Academy of Sciences, BIOCEV, Prumyslova 595, 252 50 Vestec, Czech Republic

7 Department of BioMolecular Sciences, School of Pharmacy, University of Mississippi, University, MS, 38677, USA

* Correspondence:

Dr, A.H. Tarawneh, Department of Chemistry, Tafila Technical University, Tafila 66110, Jordan

Email: [amer.tarawneh@ttu.edu.jo](mailto:amer.tarawneh@ttu.edu.jo)

Prof. S. A. Al-Trawneh, Chemistry Department, Mu'tah University, Karak 61710, Jordan

Email: [laratr@mutah.edu.jo](mailto:laratr@mutah.edu.jo)

Prof. W. Sippl, Institute of Pharmacy, Martin-Luther University of Halle-Wittenberg, 06120 Halle/Saale, Germany

Email: [wolfgang.sippl@pharmazie.uni-halle.de](mailto:wolfgang.sippl@pharmazie.uni-halle.de)

Prof. S. A. Ross, National Center for Natural Products Research, University of Mississippi, University, MS, 38677, USA

Email: [sross@olemiss.edu](mailto:sross@olemiss.edu)

**Table of Contents**

| Figure S1: | Predicted binding modes of compounds **2**, **3**, **4** and **7** in drHDAC10 (PDB ID 6UHU) |
| --- | --- |
| Figure S2: | RMSD plots of drHDAC10 (PDB ID 6UHU)-compound **1** |
| Figure S3: | RMSD plots of the crystalized ligands heavy atoms in humanized drHDAC10 (PDB ID 7U6A) |
| Figure S4: | RMSD plots of the crystalized ligands heavy atoms in humanized drHDAC10 (PDB ID 7U6B) |
| Figure S5: | RMSD plots of the crystalized ligands heavy atoms in humanized drHDAC10 (PDB ID 7U69) |
| Figure S6: | RMSD plots of the crystalized ligands heavy atoms in humanized drHDAC10 (PDB ID 7U59) |
| Figure S7: | IC50 value for compound **1** and **4** against human HDAC 1 |
| Figure S8: | IC50 value for compounds **1**, **2**, **3**, **4**, **5**, **7,** and tubastatin against human HDAC 6 |
| Figure S9: | IC50 value for compounds **1**, **4**, **5** and **7** against human HDAC 8 |
| Figure S10: | IC50 value for all synthesized compounds in vitro against zebrafish HDAC10 (drHDAC10). |
| Figure S11: | 1H NMR and 13C NMR of compound **1** in DMSO-d6 |
| Figure S12: | 1H NMR and 13C NMR of compound **2** in DMSO-d6 |
| Figure S13: | 1H NMR and 13C NMR of compound **3** in DMSO-d6 |
| Figure S14: | 1H NMR and 13C NMR of compound **4** in DMSO-d6 |
| Figure S15: | 1H NMR and 13C NMR of compound **5** in DMSO-d6 |
| Figure S16: | 1H NMR and 13C NMR of compound **6** in DMSO-d6 |
| Figure S17: | 1H NMR and 13C NMR of compound **7** in DMSO-d6 |


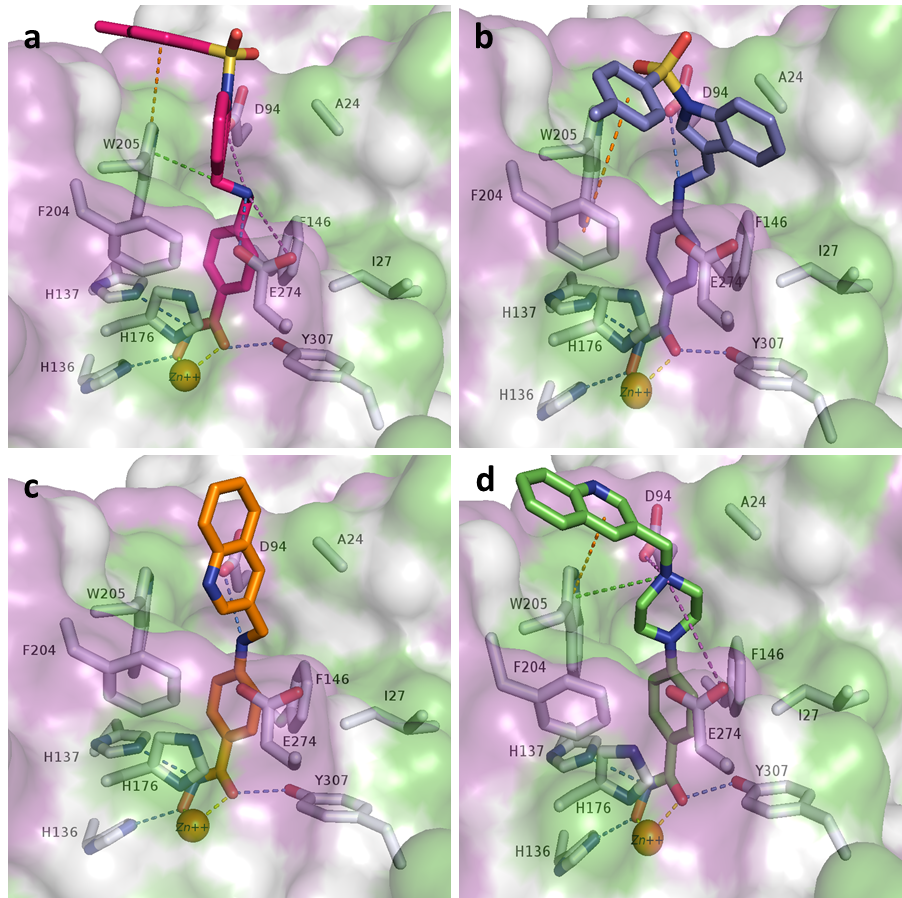
Figure S1. Predicted binding modes of compounds, a) **2** (magenta sticks), b) **3** (violet sticks), c) **4** (orange sticks), and d) **7** (light green sticks) in drHDAC10 (PDB ID 6UHU). The surface of the proteins is colored according to lipophilicity; green for hydrophobic and magenta for hydrophilic. Side chains of binding site residues are shown as white sticks and the catalytic zinc ion as orange spheres. H-bond interactions are depicted as blue-dashed lines, salt bridge interactions as magenta-dashed lines, π-π interactions as orange-dashed lines, cation-π interactions as green-dashed lines, and coordination of the zinc ion by the ligand as yellow-dashed lines.

**
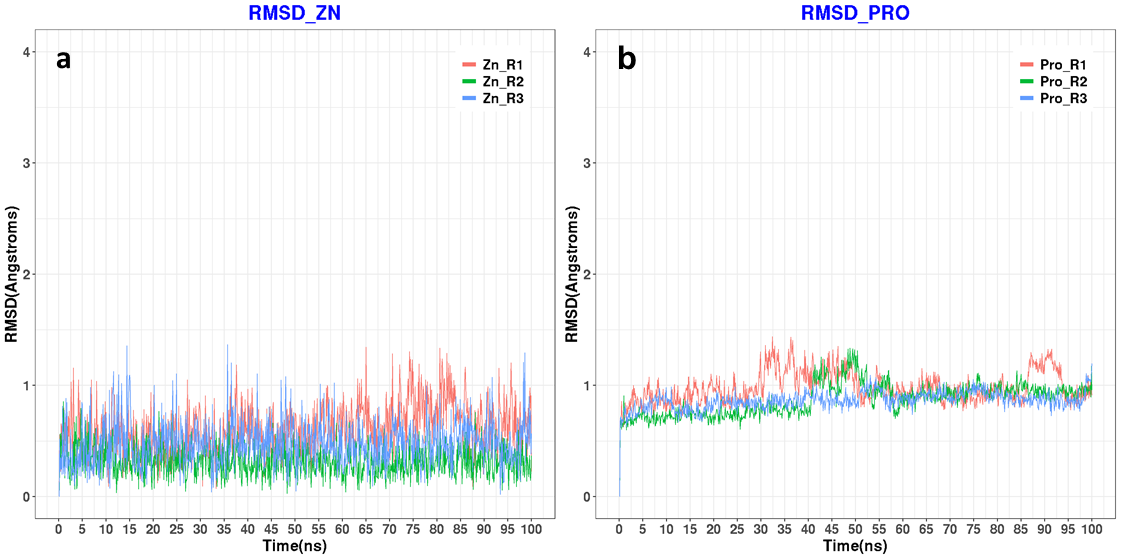
**Figure S2.a) RMSD plots of protein-heavy atoms in drHDAC10 (PDB ID 6UHU)-compound **1** docked complexes for 3 repeated MD runs each for 100 ns. b) RMSD plots of the Zn ion in drHDAC10 (PDB ID 6UHU)-compound 1 complexes for 3 repeated MD runs each for 100 ns**.**

**
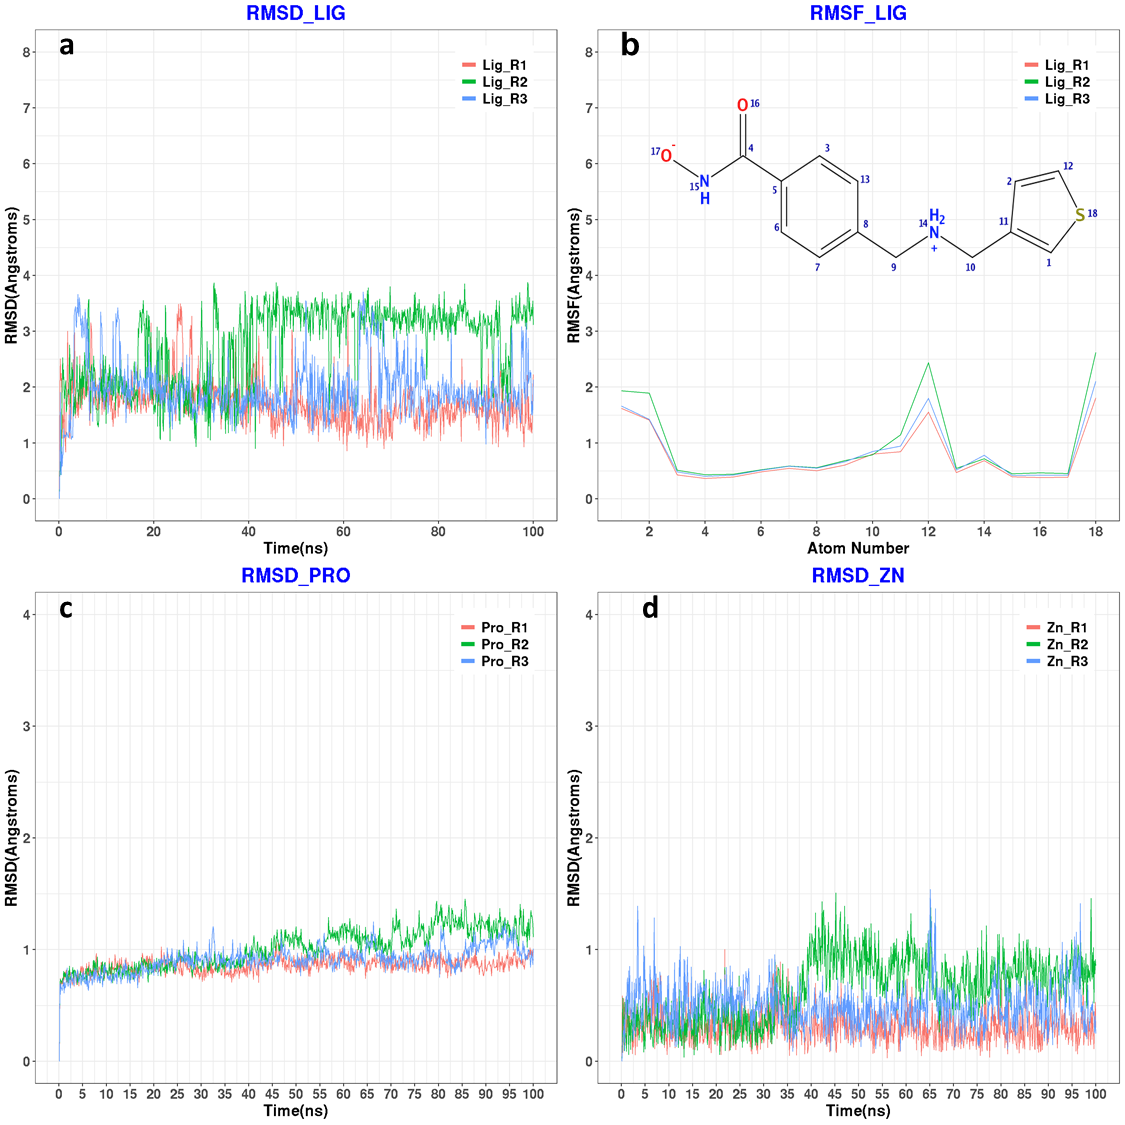
**

Figure S3. a) RMSD plots of the crystalized ligands heavy atoms in humanized drHDAC10 (PDB ID 7U6A) crystalized complexes for 3 repeated MD runs each for 100 ns. b) RMSF plots of the crystalized ligands heavy atoms in humanized drHDAC10 (PDB ID 7U6A) crystalized complexes for 3 repeated MD runs each for 100 ns. c) RMSD plots of protein heavy atoms in humanized drHDAC10 (PDB ID 7U6A) crystalized complexes for 3 repeated MD runs each for 100 ns. d) RMSD plots of the Zn ion in humanized drHDAC10 (PDB ID 7U6A) crystalized complexes for 3 repeated MD runs each for 100 ns.


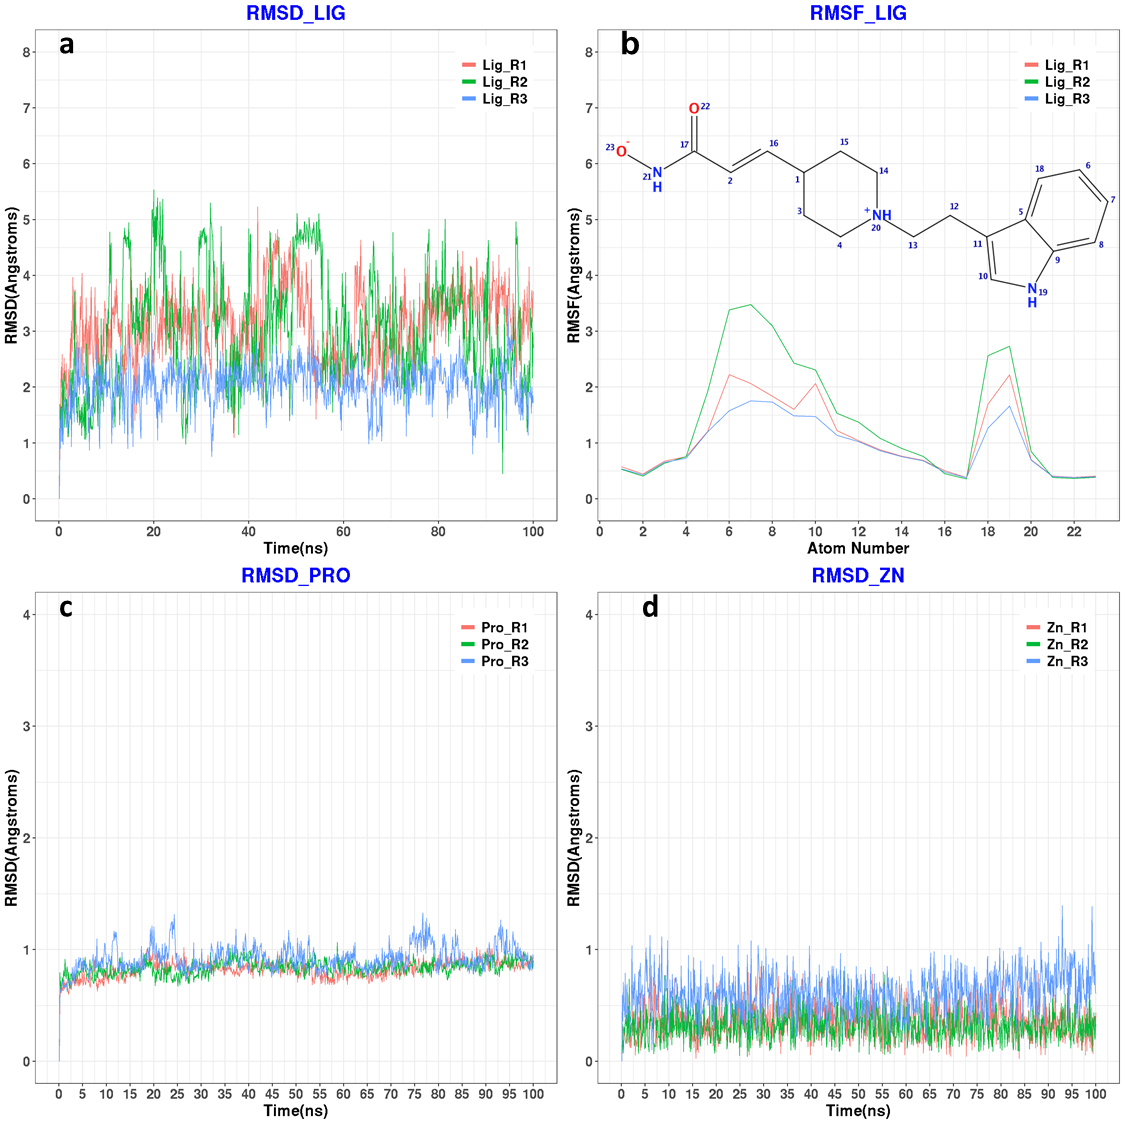


Figure S4. a) RMSD plots of the crystalized ligands heavy atoms in humanized drHDAC10 (PDB ID 7U6B) crystalized complexes for 3 repeated MD runs each for 100 ns. b) RMSF plots of the crystalized ligands heavy atoms in humanized drHDAC10 (PDB ID 7U6B) crystalized complexes for 3 repeated MD runs each for 100 ns. c) RMSD plots of protein-heavy atoms in humanized drHDAC10 (PDB ID 7U6B) crystalized complexes for 3 repeated MD runs each for 100 ns. b) RMSD plots of the Zn ion in humanized drHDAC10 (PDB ID 7U6B) crystalized complexes for 3 repeated MD runs each for 100 ns.


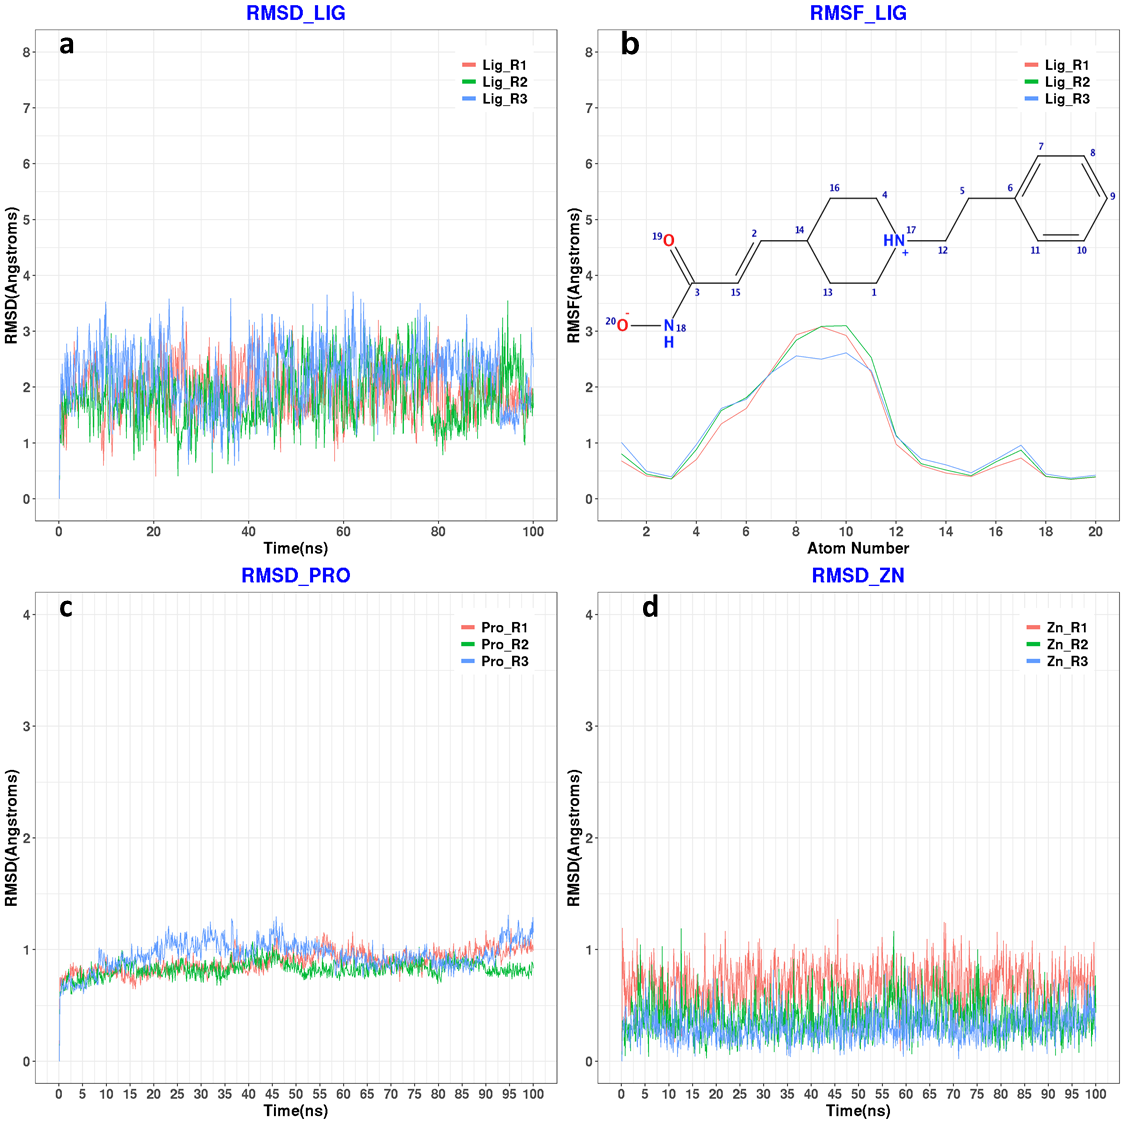


Figure S5**.** a) RMSD plots of the crystalized ligands heavy atoms in humanized drHDAC10 (PDB ID 7U69) crystalized complexes for 3 repeated MD runs each for 100 ns. b) RMSF plots of the crystalized ligands heavy atoms in humanized drHDAC10 (PDB ID 7U69) crystalized complexes for 3 repeated MD runs each for 100 ns. c) RMSD plots of protein-heavy atoms in humanized drHDAC10 (PDB ID 7U69) crystalized complexes for 3 repeated MD runs each for 100 ns. d) RMSD plots of the Zn ion in humanized drHDAC10 (PDB ID 7U69) crystalized complexes for 3 repeated MD runs each for 100 ns.


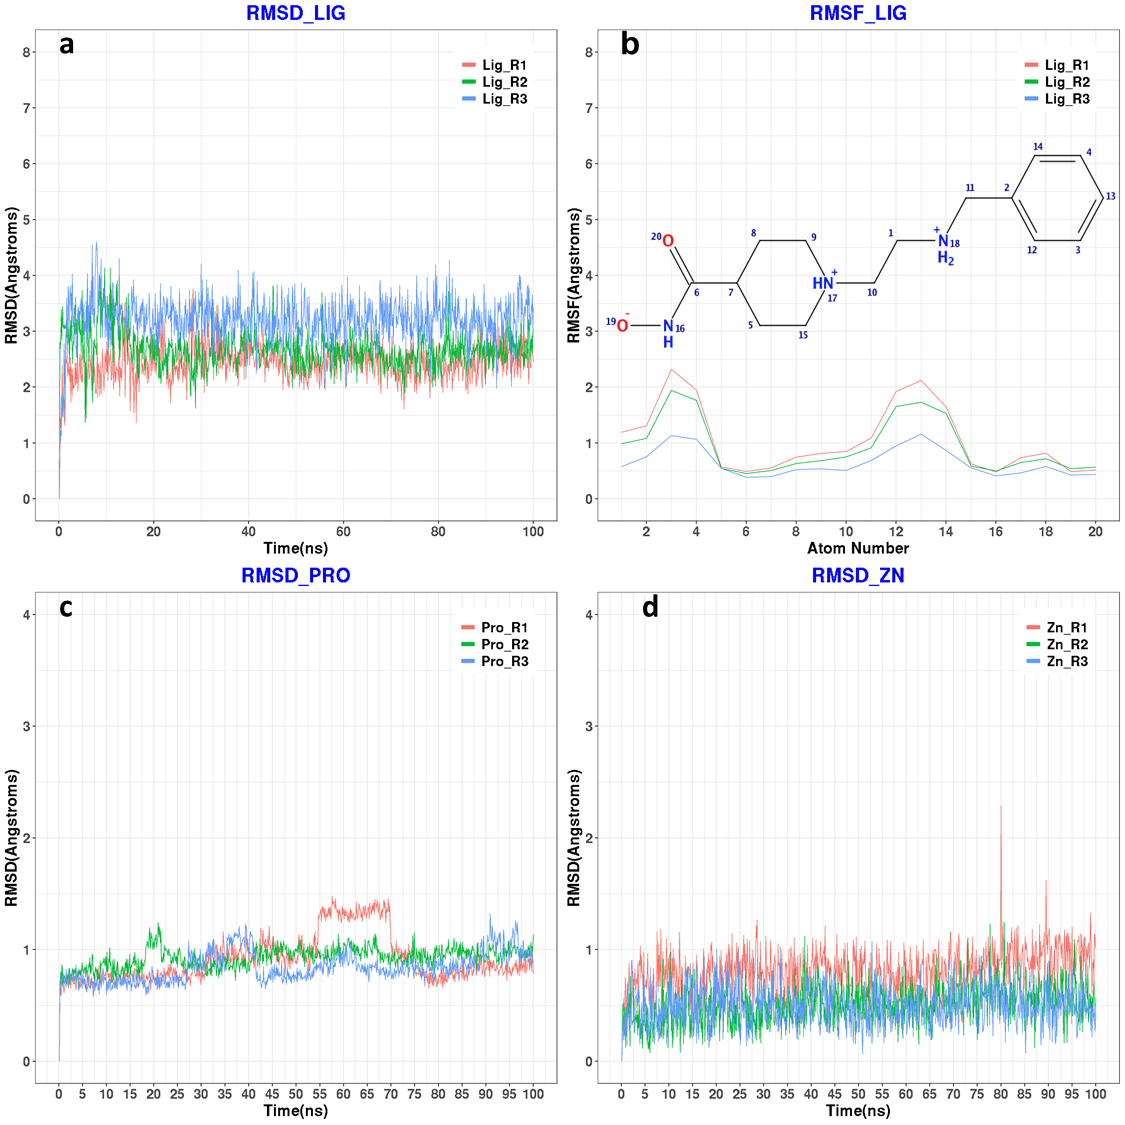


Figure S6.a) RMSD plots of the crystalized ligands heavy atoms in humanized drHDAC10 (PDB ID 7U59) crystalized complexes for 3 repeated MD runs each for 100 ns. b) RMSF plots of the crystalized ligands heavy atoms in humanized drHDAC10 (PDB ID 7U59) crystalized complexes for 3 repeated MD runs each for 100 ns. c) RMSD plots of protein-heavy atoms in humanized drHDAC10 (PDB ID 7U59) crystalized complexes for 3 repeated MD runs each for 100 ns. d) RMSD plots of the Zn ion in humanized drHDAC10 (PDB ID 7U59) crystalized complexes for 3 repeated MD runs each for 100 ns.


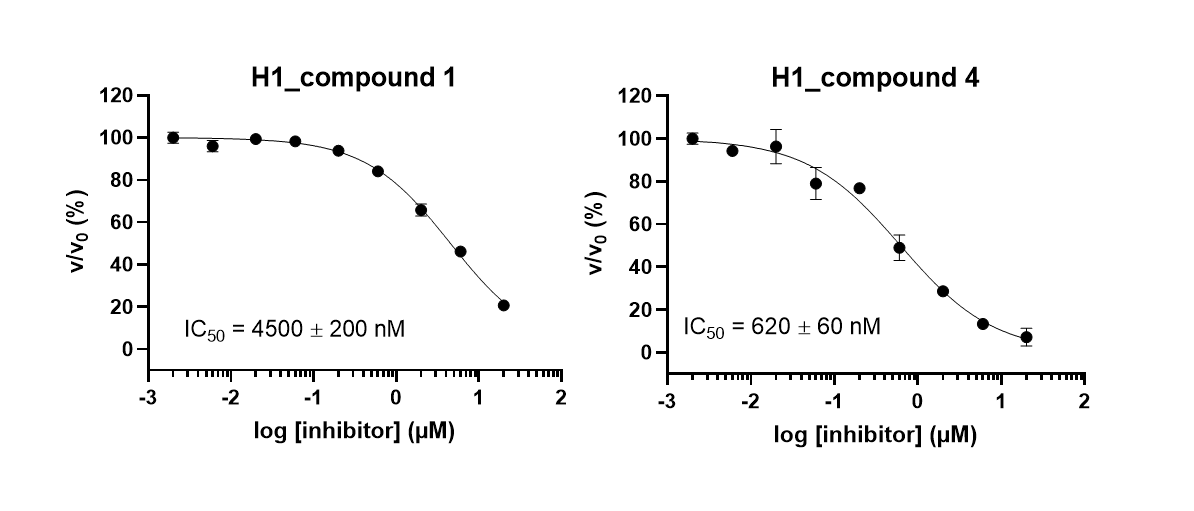


**Figure S7.** IC50 value for compound **1** and **4** against human HDAC 1.


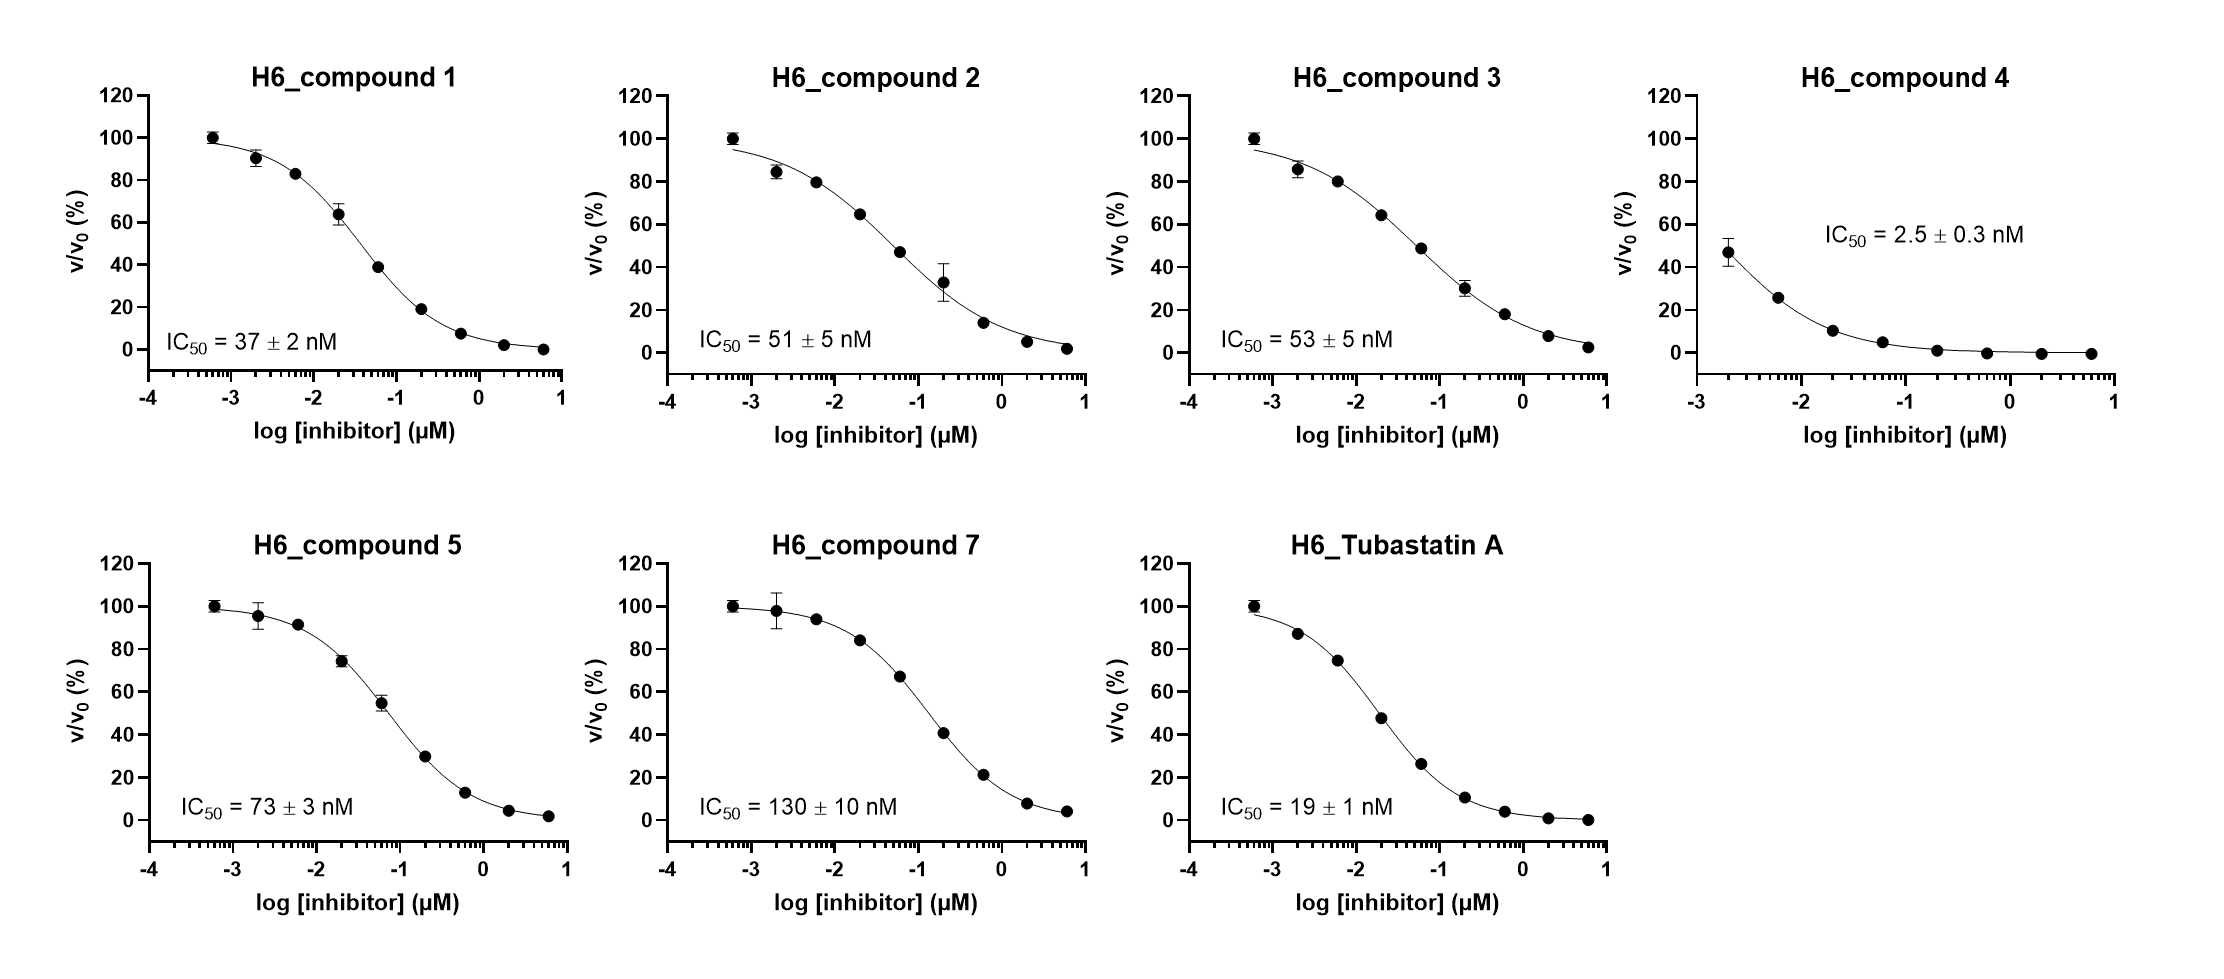


Figure S8.IC50 value for compounds **1**, **2**, **3**, **4**, **5**, **7** and tubastatin against human HDAC 6.


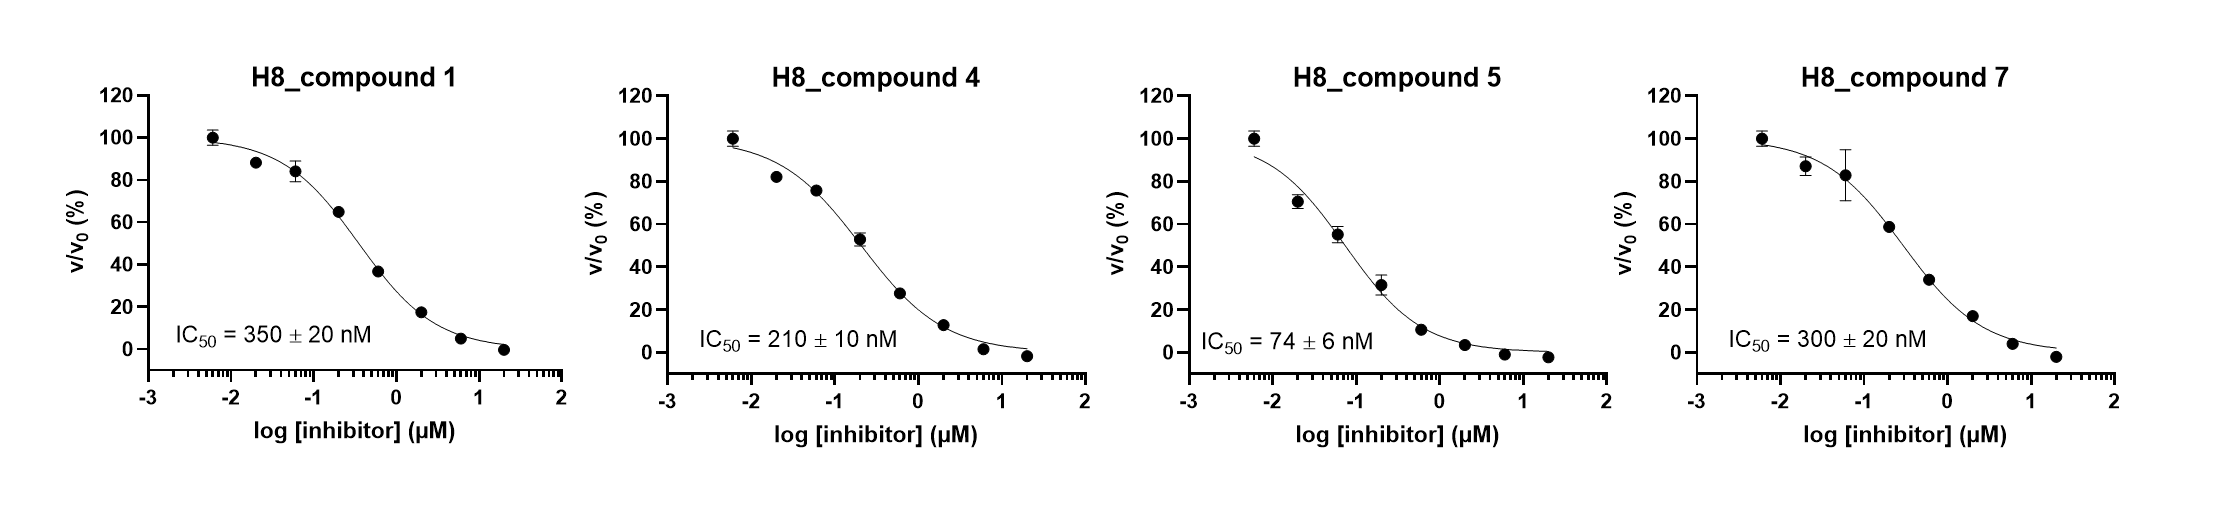


Figure S9.IC50 value for compounds **1**, **4**, **5,** and **7** against human HDAC 8.


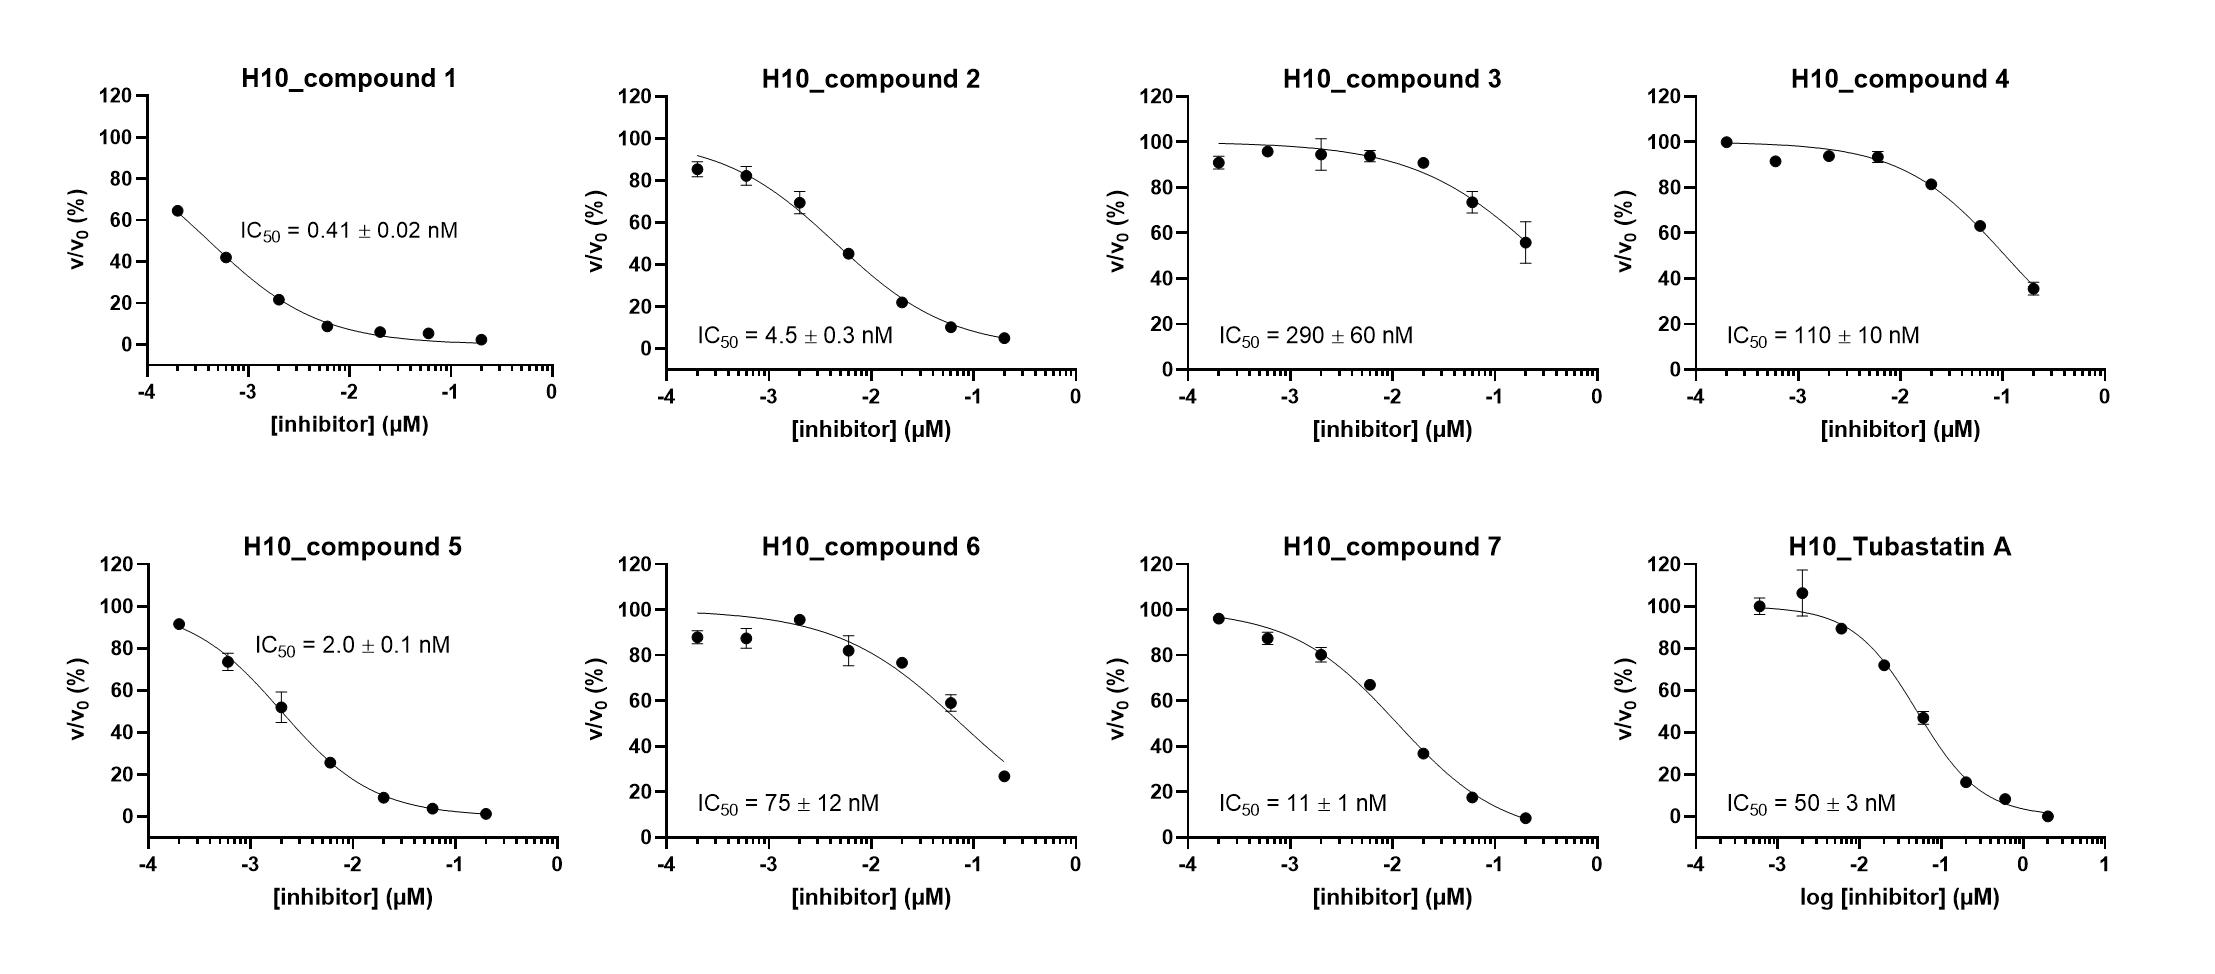


Figure S10. IC50 value for all synthesized compounds in vitro against zebrafish HDAC10 (drHDAC10).

Figure S11: 1H NMR and 13C NMR of compound 1 in DMSO-d6.


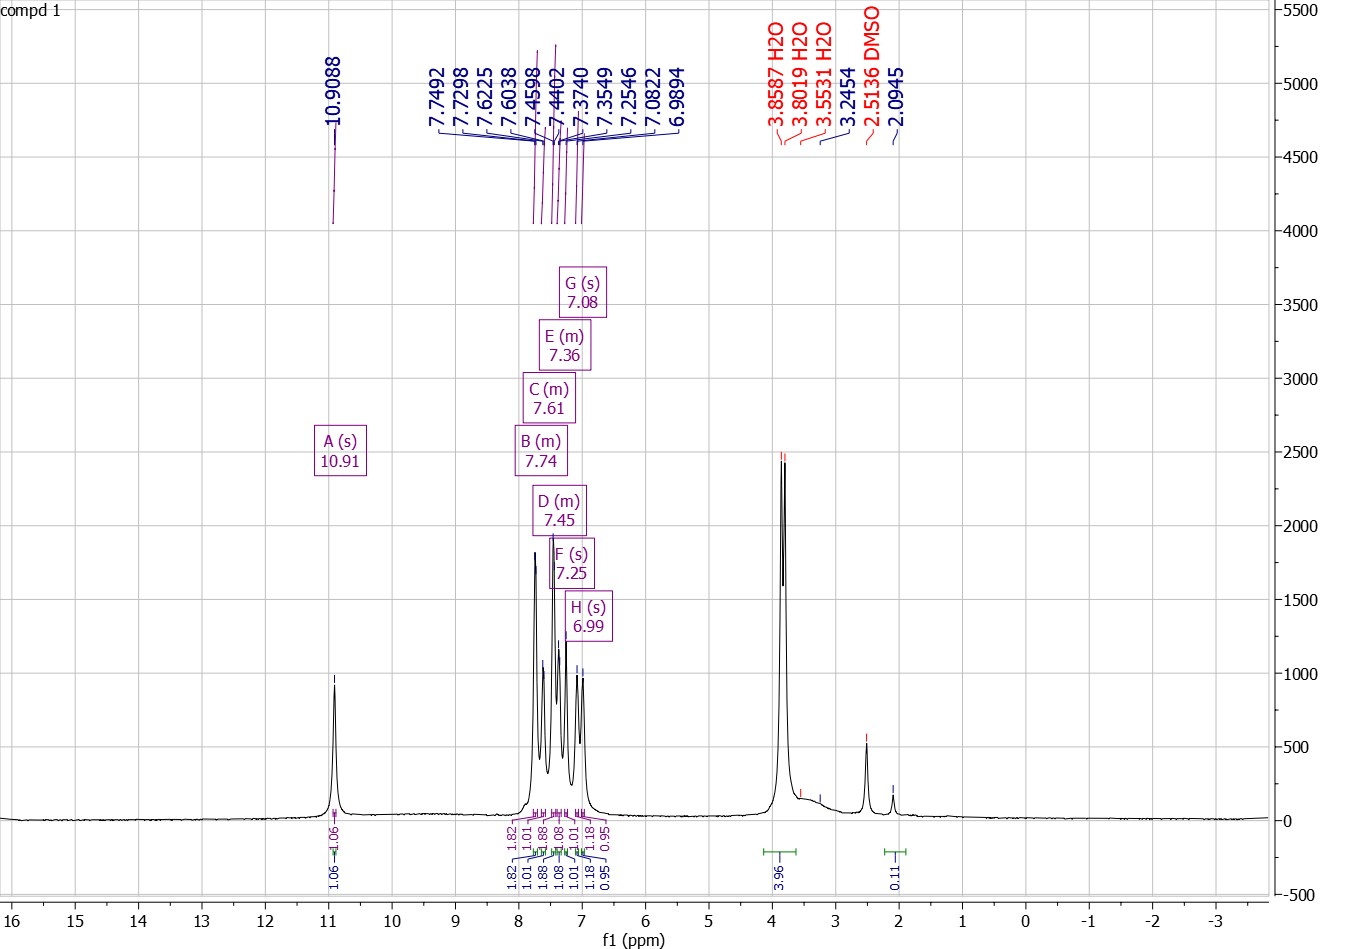


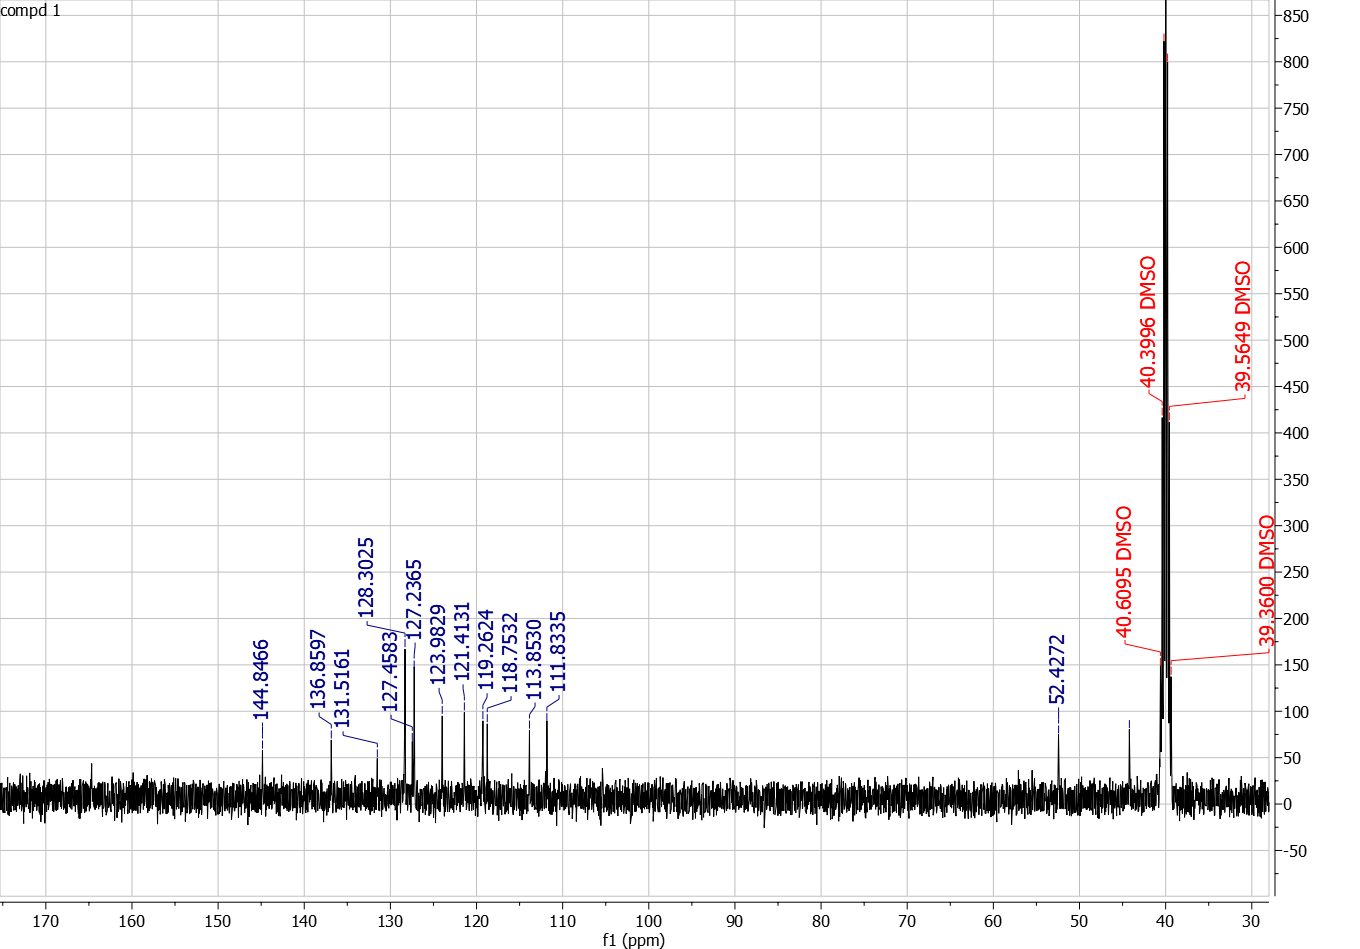


Figure S12: 1H NMR and 13C NMR of compound **2** in DMSO-d6.


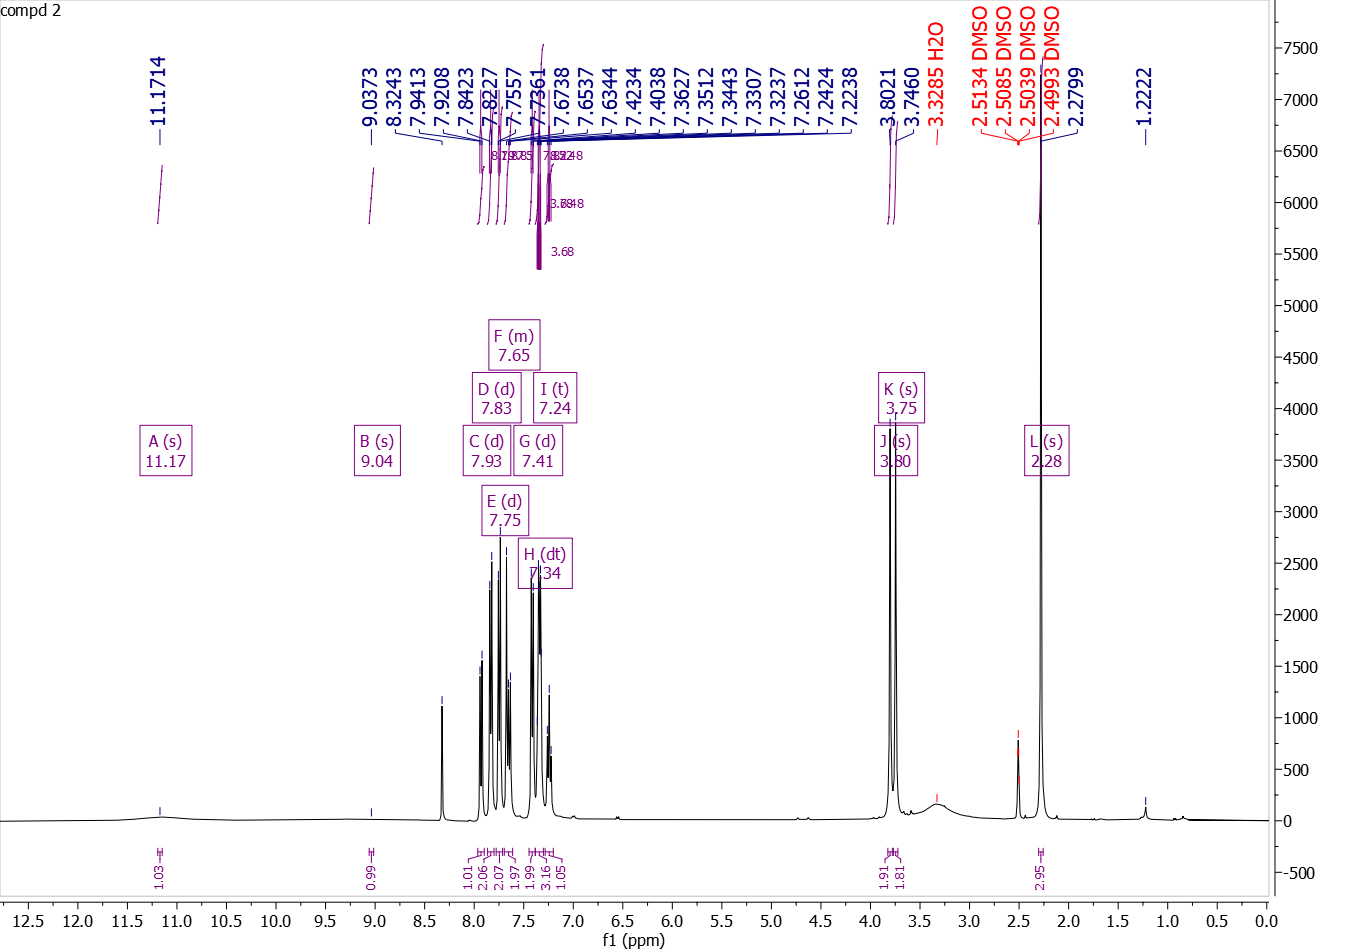


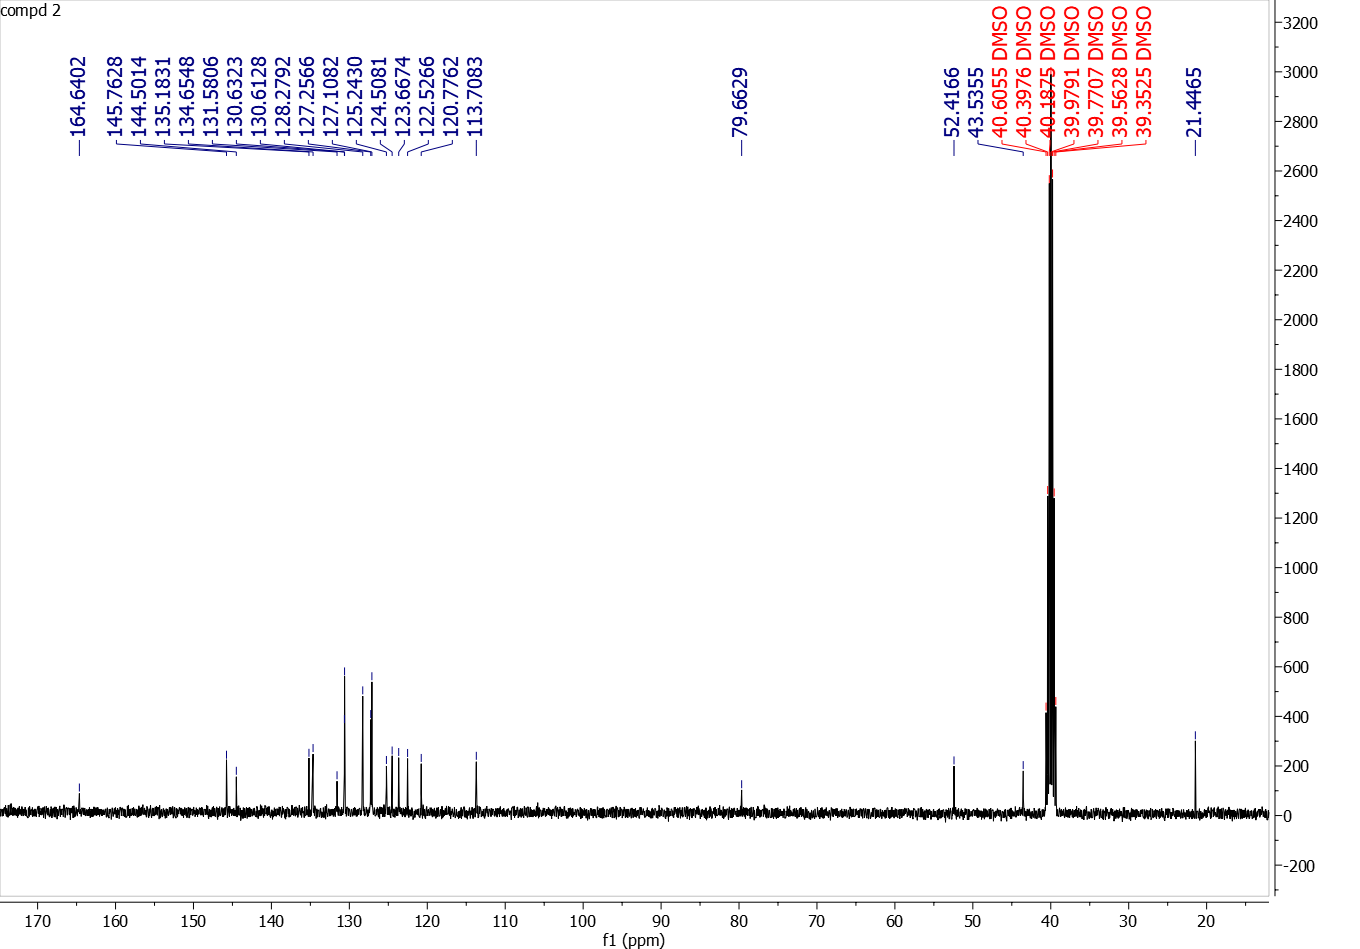


Figure S13: 1H NMR and 13C NMR of compound **3** in DMSO-d6


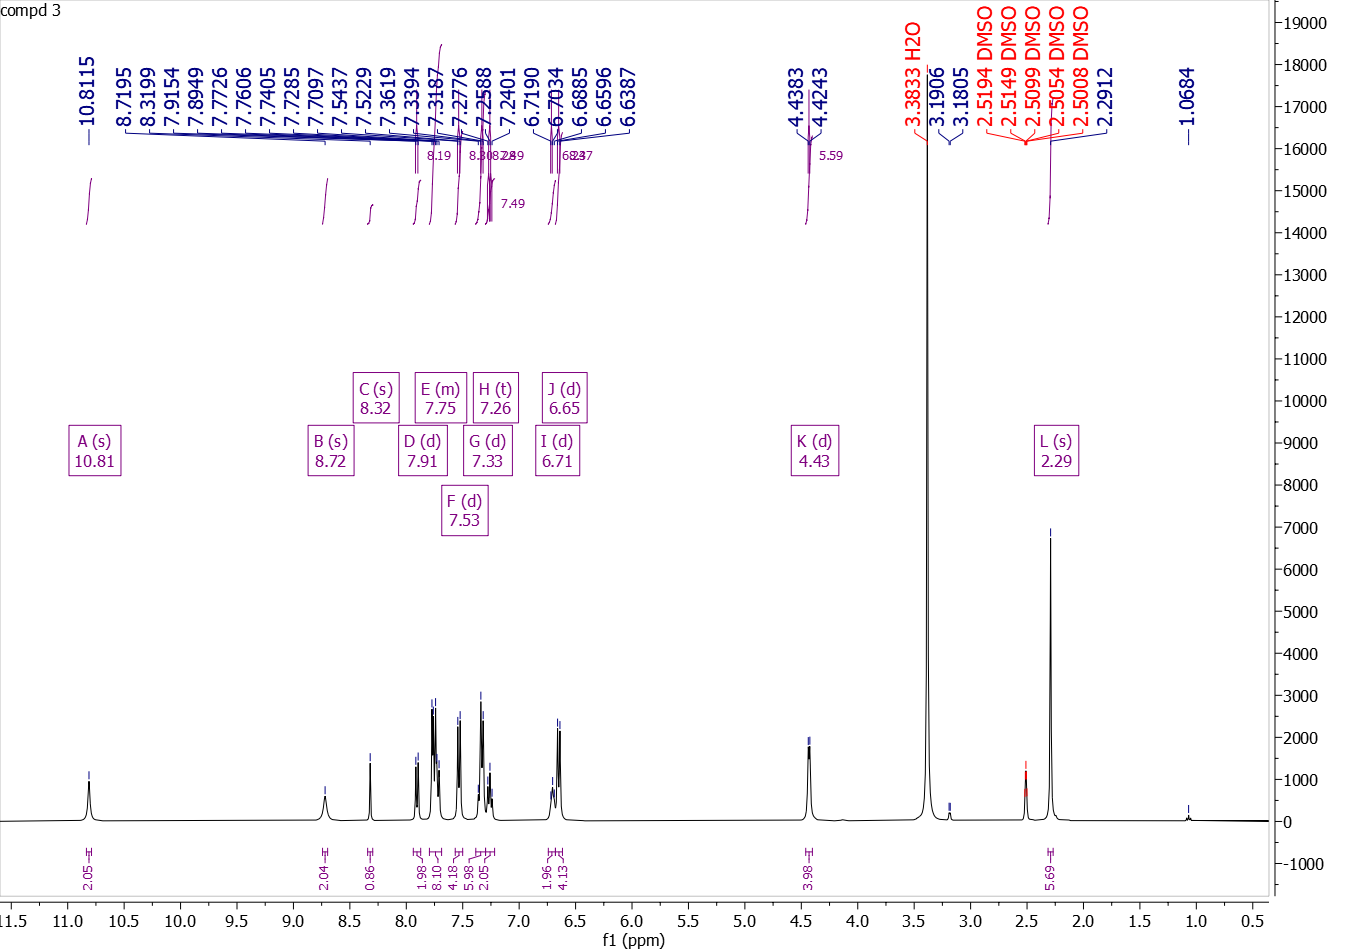


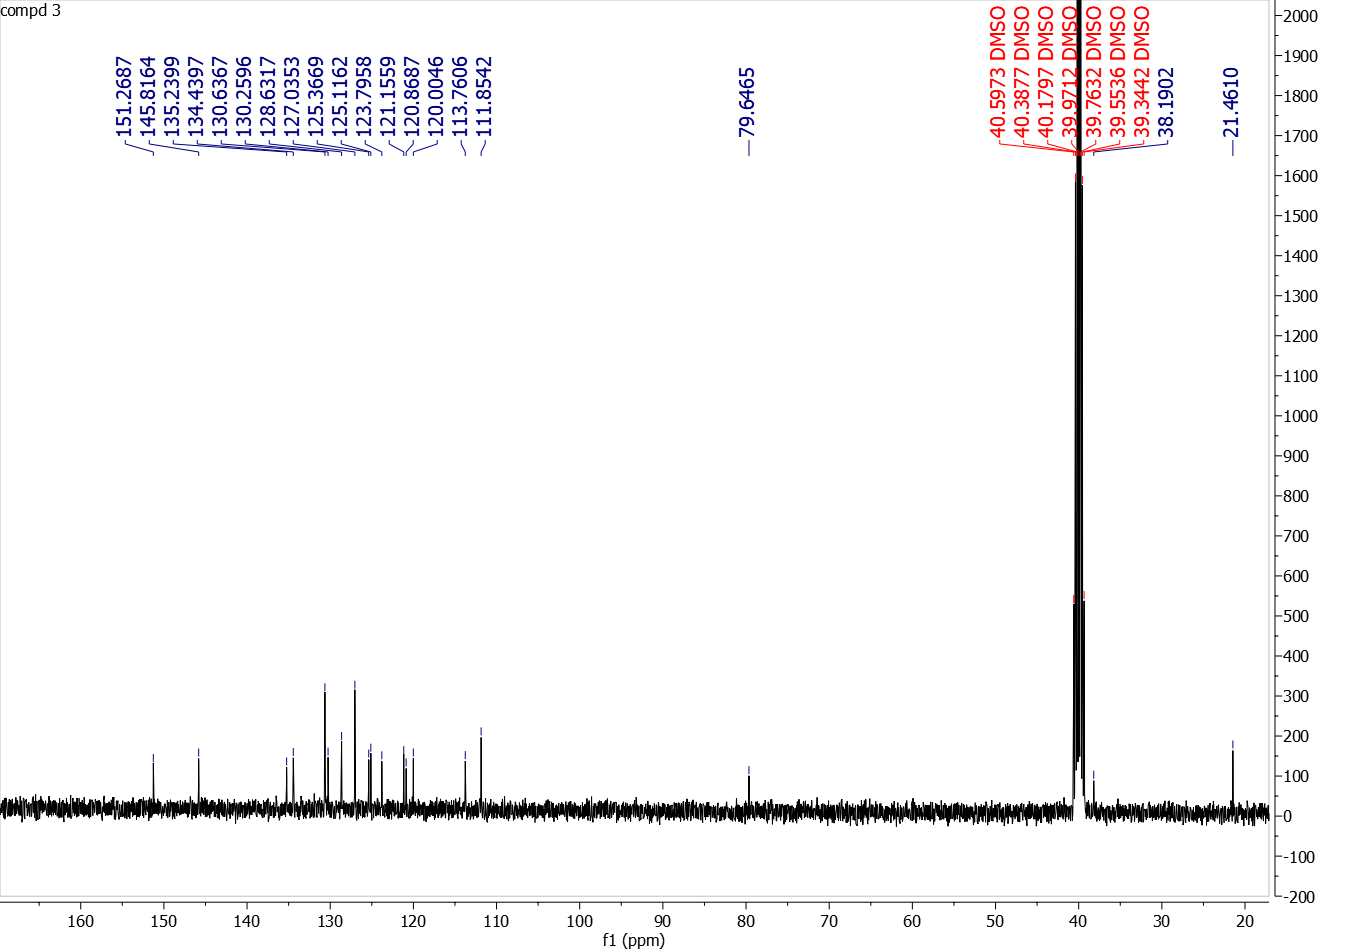


Figure S14: 1H NMR and 13C NMR of compound **4** in DMSO-d6


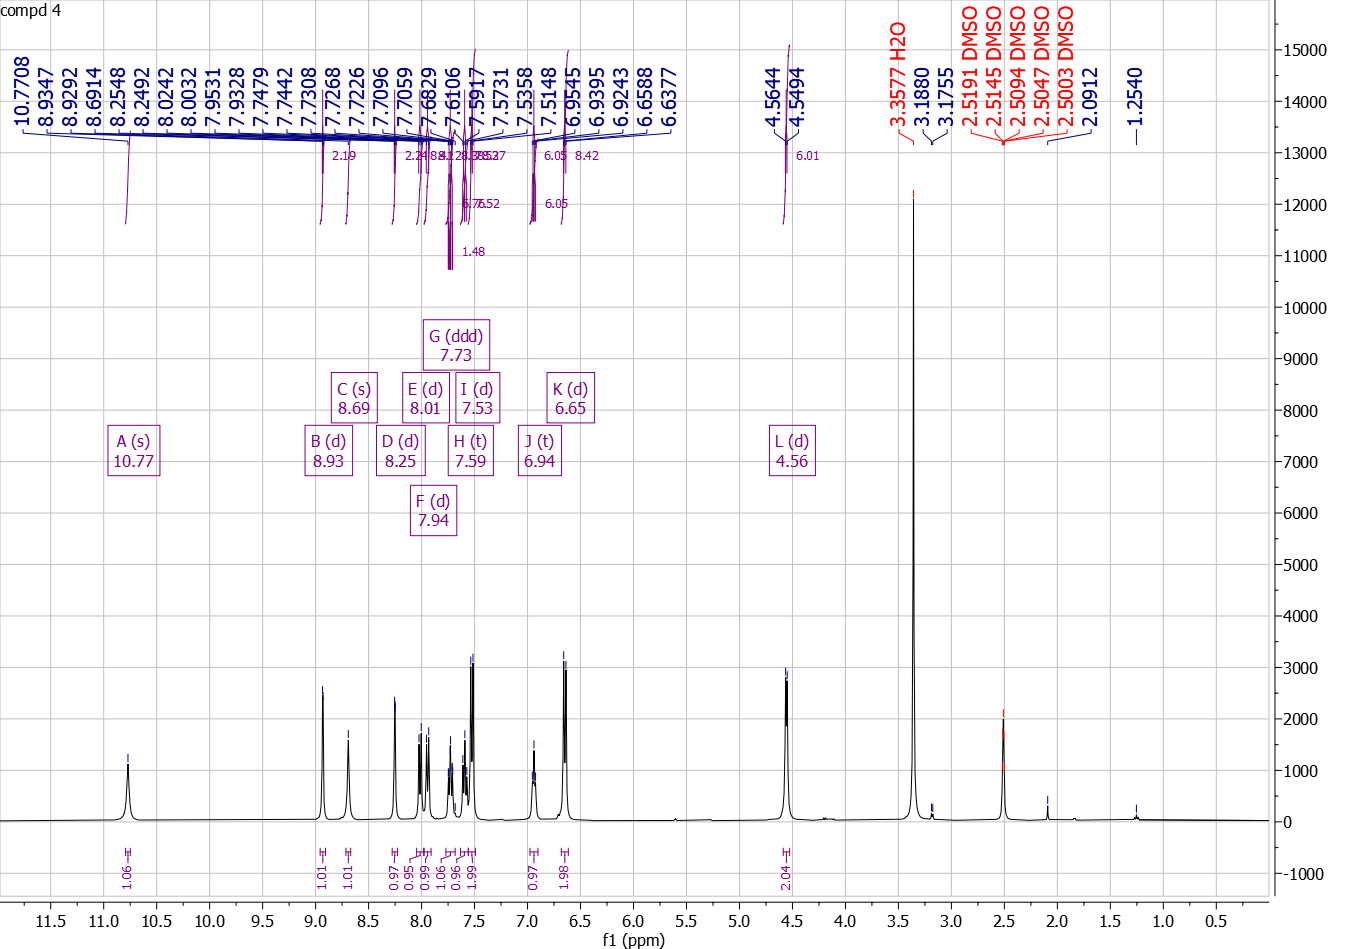


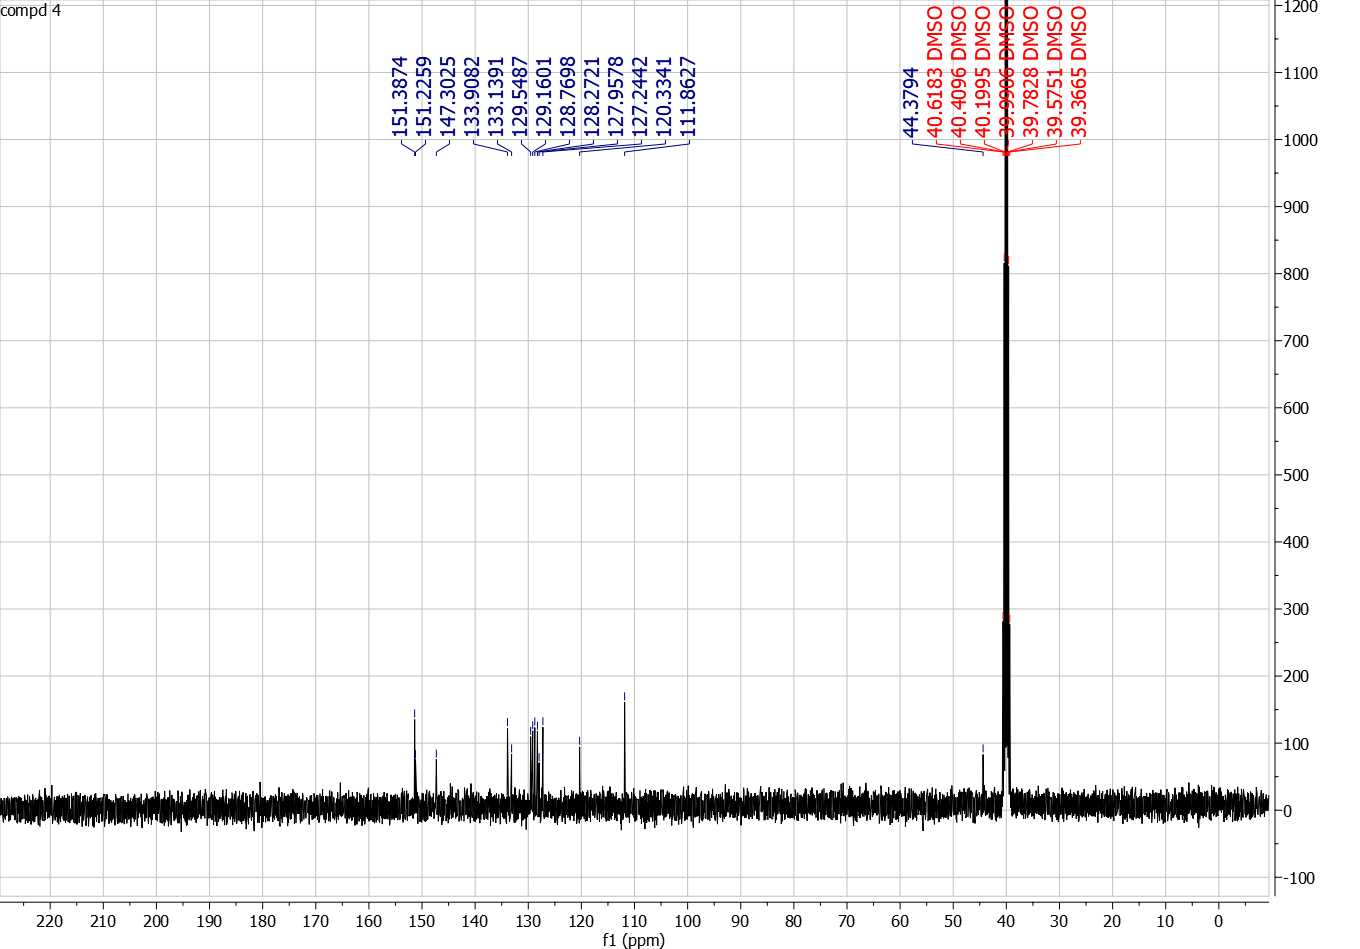


Figure S15: 1H NMR and 13C NMR of compound **5** in DMSO-d6


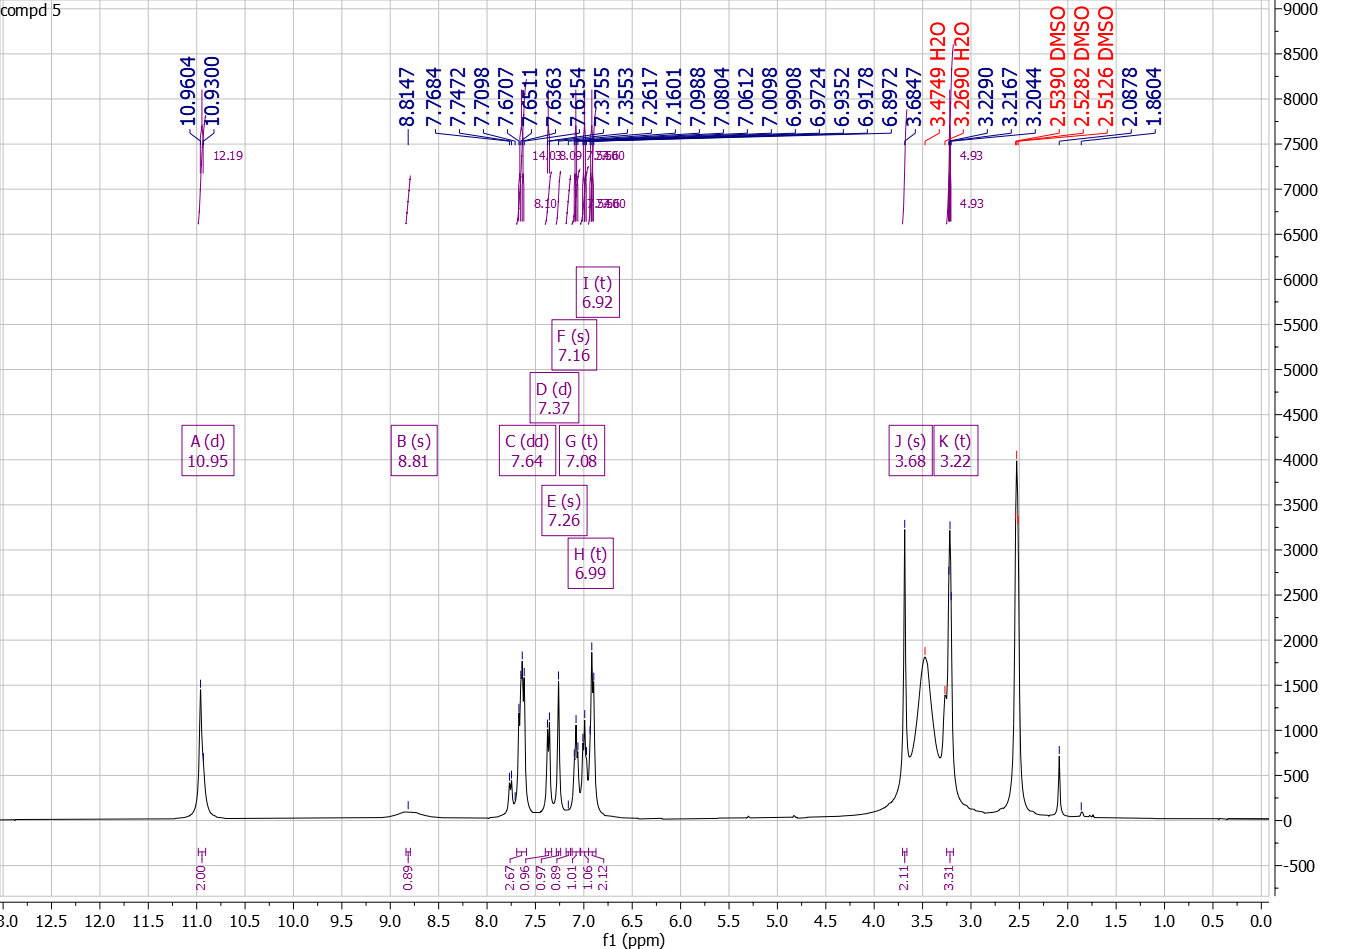


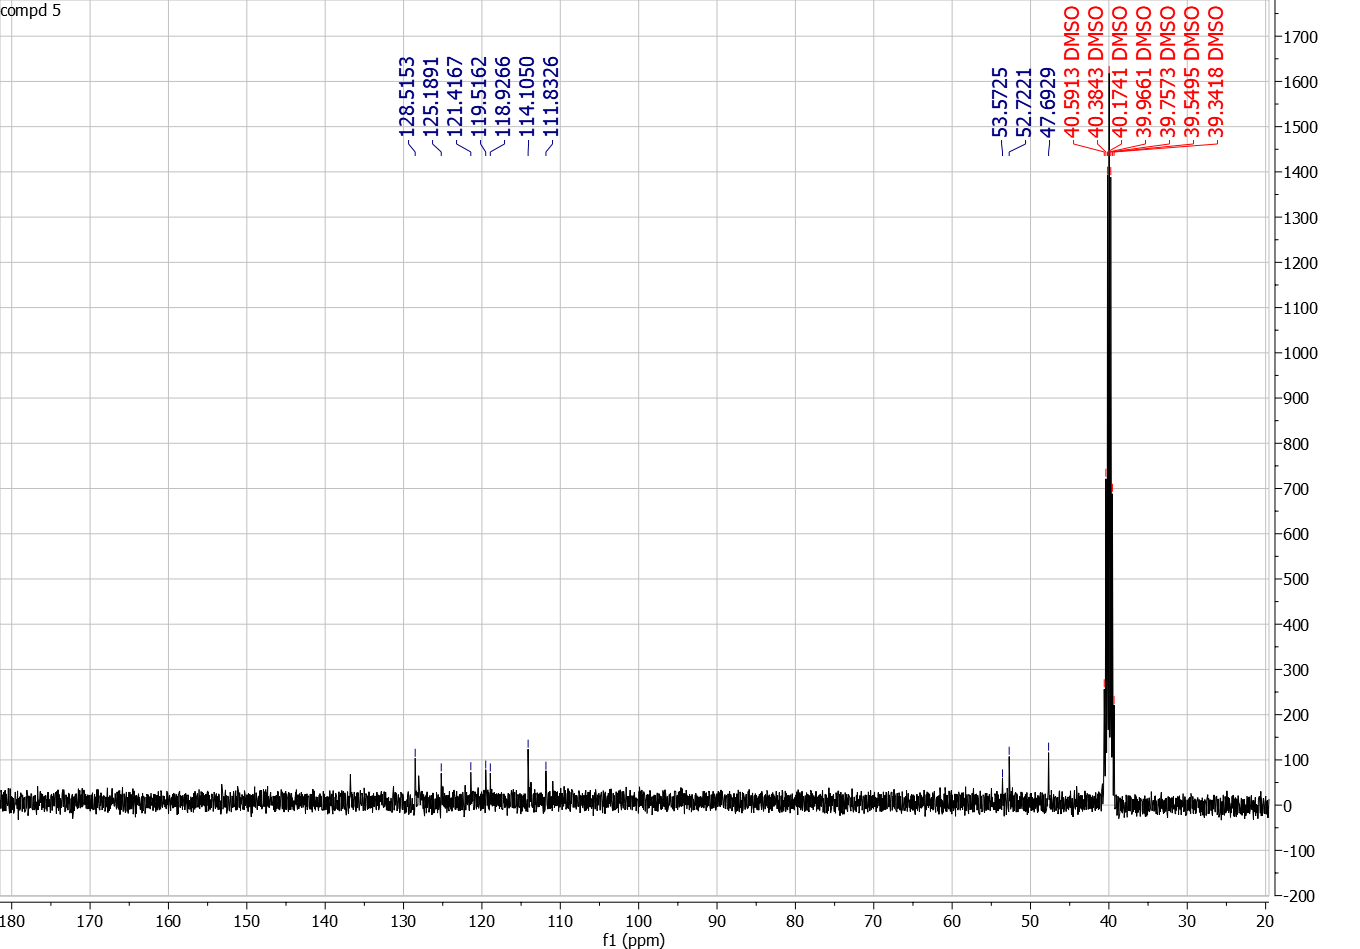


Figure S16: 1H NMR and 13C NMR of compound **6** in DMSO-d6
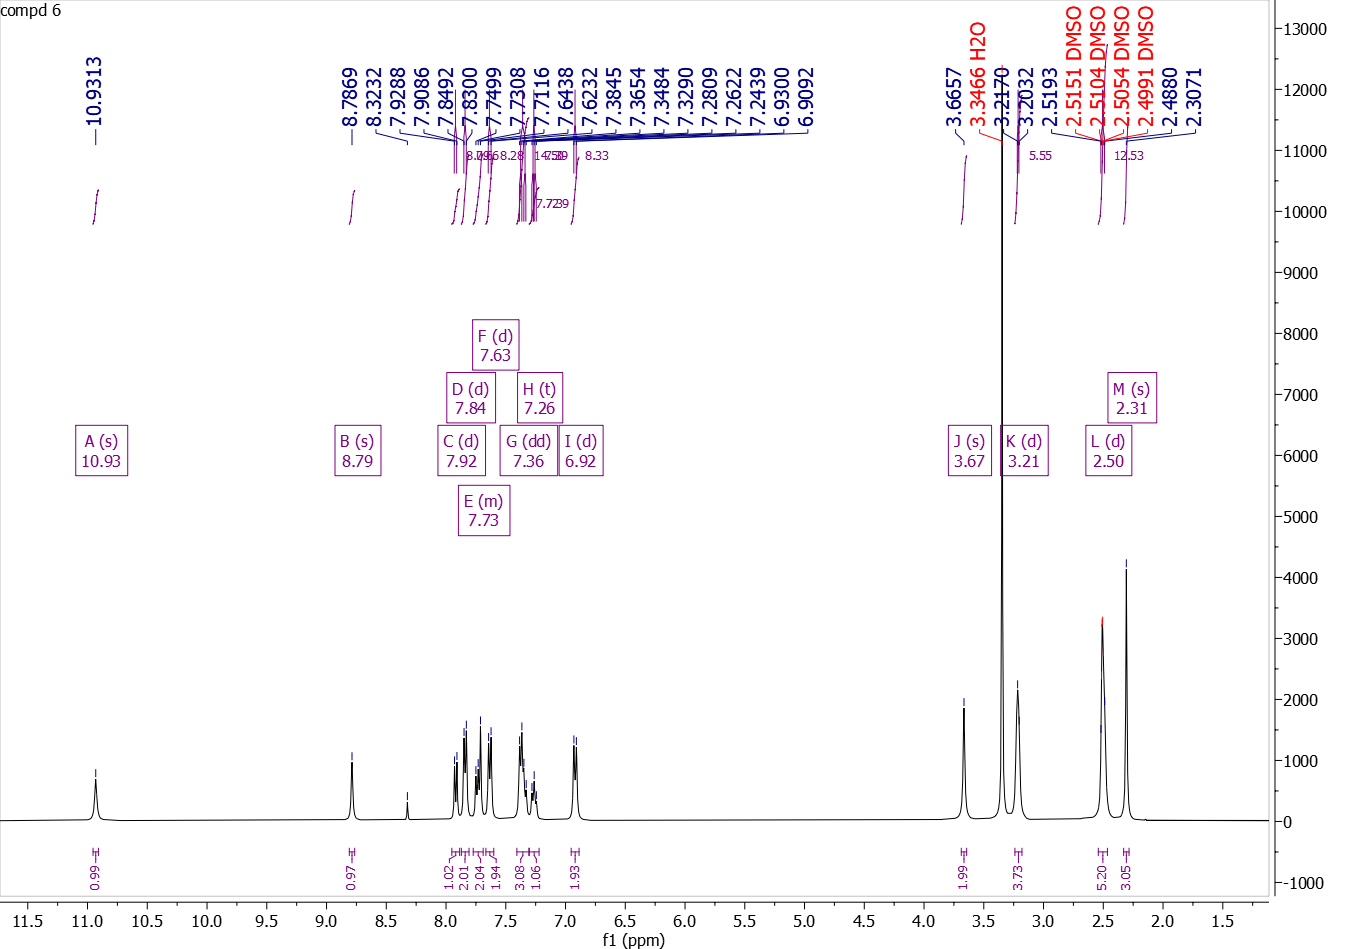


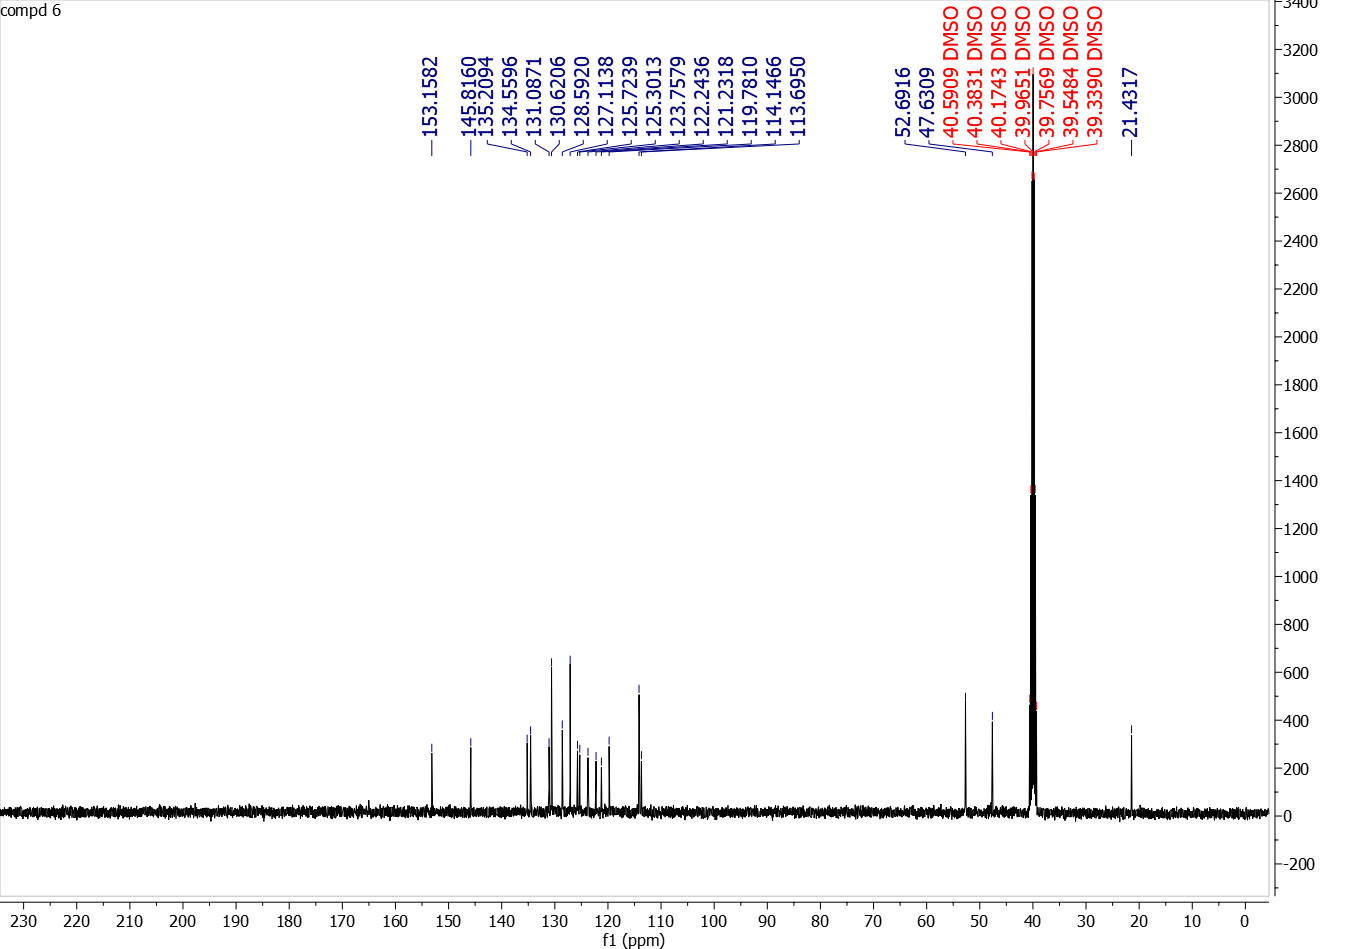


Figure S17: 1H NMR and 13C NMR of compound **7** in DMSO-d6


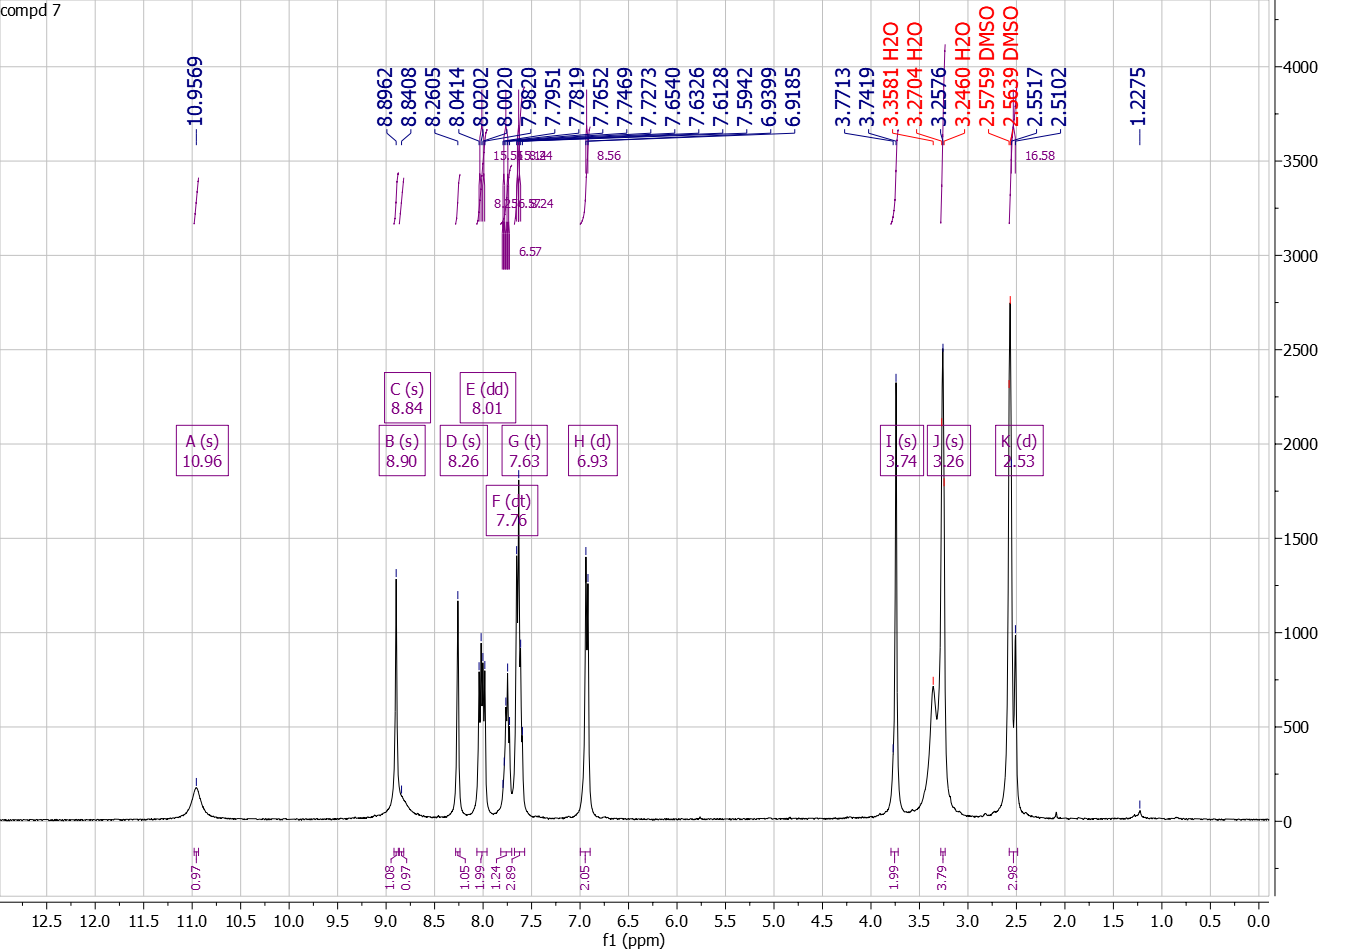


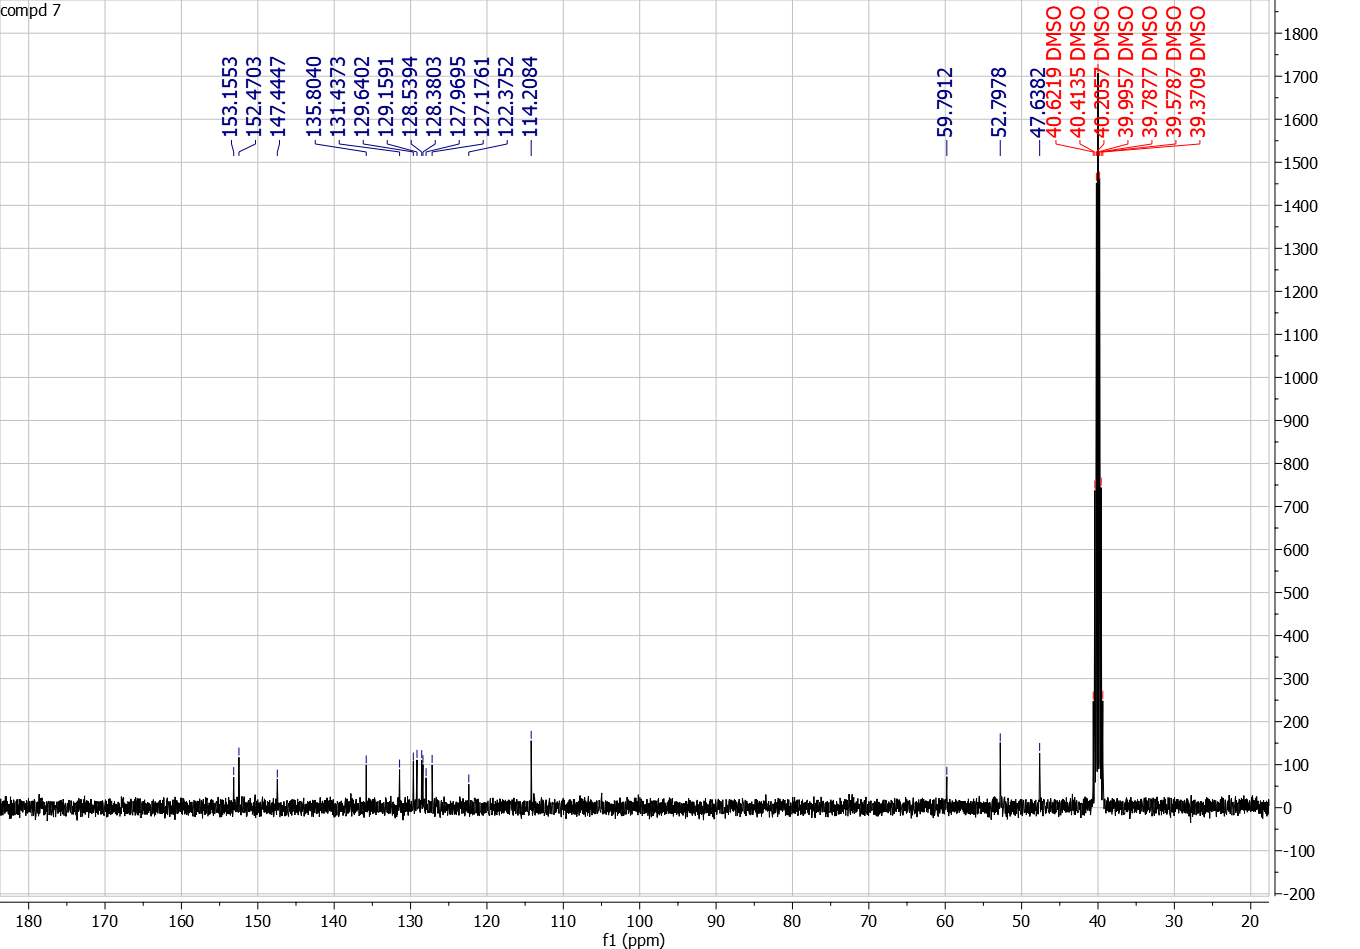

Supplement: Supplementary file 1 [file da69162c36f4ef238fa5981c.docx]
